# Supplementary material
Source: ML conference proceedings conference paper supplement (https://openreview.net/forum?id=KG2RTUXXU7)
Supplement: supplementary_material [file attachment]

---

# Supplementary Material For NeurIPS 2021

---

Anonymous Author(s)

Affiliation

Address

email

## 1 Information of datasets

All benchmark datasets involved in this paper are available in this supplementary material (see ./data/), and the statistics of these datasets are summarized in Table 1.

Table 1: Description of datasets

| Datasets   | CALFW  | FaceV5 | CFPW  | CMU   | Colon   | CPLFW | Olivetti | Umist |
|------------|--------|--------|-------|-------|---------|-------|----------|-------|
| # Samples  | 12174  | 2500   | 7000  | 2856  | 62      | 11652 | 400      | 575   |
| # Features | 256    | 256    | 256   | 1024  | 2000    | 256   | 4096     | 644   |
| # Subjects | 4025   | 500    | 500   | 68    | 2       | 3930  | 40       | 20    |
| Datasets   | Dexter | FERET  | GTDB  | LFW   | Madelon | Mpeg7 | MUCT     | Yale  |
| # Samples  | 600    | 11338  | 750   | 13233 | 2600    | 1400  | 3755     | 165   |
| # Features | 20000  | 256    | 21600 | 256   | 500     | 6000  | 256      | 1024  |
| # Subjects | 2      | 994    | 50    | 5749  | 2       | 70    | 276      | 15    |

## 2 Fast spectral clustering

We also conducted the experiment for the instance of ratio-cut described in Section 3.1. That is to say, we optimized the following problem by the algorithm proposed in this paper.

$$\min_{\mathbf{Y} \in \mathbb{R}^{n \times c}} Tr \left( (\mathbf{Y}^T \mathbf{Y})^{-p} \mathbf{Y}^T \mathbf{G}^{(k)} \mathbf{Y} \right), \quad (1)$$

with  $p = 1$  and

$$\mathbf{g}_{ij}^{(k)} = \begin{cases} \sum_{j=1}^n w_{ij} & i = j \\ -w_{ij} & i \neq j, \text{ and } \mathbf{x}_i \in \mathcal{N}_k(\mathbf{x}_j) \\ 0 & \text{Otherwise} \end{cases}, \quad (2)$$

where

$$w_{ij} = \begin{cases} e^{-\frac{\|\mathbf{x}_i - \mathbf{x}_j\|}{t}} & \text{if } \mathbf{x}_i \in \mathcal{N}_k(\mathbf{x}_j) \\ 0 & \text{otherwise} \end{cases}, \quad (3)$$

where  $t$  is a parameter, and is setted as the mean value of the  $\{\|\mathbf{x}_i - \mathbf{x}_j\| \mid \mathbf{x}_i \in \mathcal{N}_k(\mathbf{x}_j), i, j = 1, \dots, n\}$ . We call this fast implementation Fast spectral clustering (FSC) and compare it with the traditional spectral clustering optimized by eigendecomposition.

The experimental results are shown in Table 2. The k-NN graph is constructed by the 'Brute-force' algorithm and the time it consumed is shown in the column named "Graph".

From the experimental results, we can see that FSC has achieved a great improvement in performance and time, compared to SC, which verifies the effectiveness and efficiency of the proposed algorithm.

Table 2: Ratio-cut optimized by the proposed algorithm vs. SC derived from it

| Datasets | Performance ( $\pm$ std) |                                |                               | Time (s) |         |         |
|----------|--------------------------|--------------------------------|-------------------------------|----------|---------|---------|
|          | Metrics                  | SC                             | FSC                           | Graph    | SC      | FSC     |
| CALFW    | ACC                      | 0.562( $\pm 6.2\text{e-}03$ )  | 0.791( $\pm 2.7\text{e-}03$ ) | 9.3E+00  | 1.6E+03 | 1.0E+00 |
|          | NMI                      | 0.760( $\pm 2.3\text{e-}02$ )  | 0.959( $\pm 6.4\text{e-}04$ ) |          |         |         |
|          | ARI                      | 0.006( $\pm 3.7\text{e-}03$ )  | 0.674( $\pm 5.5\text{e-}03$ ) |          |         |         |
| FaceV5   | ACC                      | 0.616( $\pm 1.5\text{e-}02$ )  | 0.771( $\pm 1.2\text{e-}02$ ) | 3.3E-01  | 5.4E+00 | 1.8E-01 |
|          | NMI                      | 0.809( $\pm 1.3\text{e-}02$ )  | 0.931( $\pm 3.7\text{e-}03$ ) |          |         |         |
|          | ARI                      | 0.069( $\pm 2.2\text{e-}02$ )  | 0.673( $\pm 1.5\text{e-}02$ ) |          |         |         |
| CFPW     | ACC                      | 0.533( $\pm 1.1\text{e-}02$ )  | 0.800( $\pm 3.1\text{e-}03$ ) | 2.8E+00  | 3.0E+01 | 5.1E-01 |
|          | NMI                      | 0.732( $\pm 1.0\text{e-}02$ )  | 0.882( $\pm 2.3\text{e-}03$ ) |          |         |         |
|          | ARI                      | 0.082( $\pm 1.6\text{e-}02$ )  | 0.356( $\pm 4.0\text{e-}02$ ) |          |         |         |
| CMU      | ACC                      | 0.289( $\pm 9.5\text{e-}03$ )  | 0.291( $\pm 9.0\text{e-}03$ ) | 4.8E-01  | 5.8E-01 | 1.6E-01 |
|          | NMI                      | 0.552( $\pm 7.1\text{e-}03$ )  | 0.565( $\pm 8.4\text{e-}03$ ) |          |         |         |
|          | ARI                      | 0.173( $\pm 7.2\text{e-}03$ )  | 0.192( $\pm 7.9\text{e-}03$ ) |          |         |         |
| Colon    | ACC                      | 0.644( $\pm 3.4\text{e-}02$ )  | 0.690( $\pm 1.4\text{e-}01$ ) | 4.7E-04  | 4.3E-02 | 5.8E-03 |
|          | NMI                      | 0.065( $\pm 1.7\text{e-}02$ )  | 0.187( $\pm 1.8\text{e-}01$ ) |          |         |         |
|          | ARI                      | 0.072( $\pm 4.0\text{e-}02$ )  | 0.214( $\pm 2.2\text{e-}01$ ) |          |         |         |
| CPLFW    | ACC                      | 0.331( $\pm 2.5\text{e-}03$ )  | 0.391( $\pm 2.5\text{e-}03$ ) | 7.0E+00  | 3.8E+03 | 9.3E-01 |
|          | NMI                      | 0.785( $\pm 3.8\text{e-}03$ )  | 0.815( $\pm 1.6\text{e-}03$ ) |          |         |         |
|          | ARI                      | 0.019( $\pm 1.9\text{e-}03$ )  | 0.024( $\pm 1.6\text{e-}03$ ) |          |         |         |
| Dexter   | ACC                      | 0.600( $\pm 1.1\text{e-}16$ )  | 0.591( $\pm 3.8\text{e-}02$ ) | 1.8E-02  | 6.0E-02 | 2.1E-02 |
|          | NMI                      | 0.095( $\pm 4.4\text{e-}03$ )  | 0.050( $\pm 4.8\text{e-}02$ ) |          |         |         |
|          | ARI                      | 0.039( $\pm 1.0\text{e-}05$ )  | 0.038( $\pm 2.5\text{e-}02$ ) |          |         |         |
| FERET    | ACC                      | 0.460( $\pm 7.3\text{e-}03$ )  | 0.633( $\pm 3.7\text{e-}03$ ) | 7.7E+00  | 1.5E+02 | 8.8E-01 |
|          | NMI                      | 0.737( $\pm 1.1\text{e-}02$ )  | 0.859( $\pm 6.1\text{e-}04$ ) |          |         |         |
|          | ARI                      | 0.038( $\pm 1.0\text{e-}02$ )  | 0.531( $\pm 5.3\text{e-}03$ ) |          |         |         |
| GTdb     | ACC                      | 0.492( $\pm 3.3\text{e-}02$ )  | 0.516( $\pm 1.2\text{e-}02$ ) | 2.2E-02  | 9.6E-02 | 4.3E-02 |
|          | NMI                      | 0.670( $\pm 1.8\text{e-}02$ )  | 0.683( $\pm 4.3\text{e-}03$ ) |          |         |         |
|          | ARI                      | 0.318( $\pm 4.0\text{e-}02$ )  | 0.373( $\pm 8.6\text{e-}03$ ) |          |         |         |
| LFW      | ACC                      | 0.419( $\pm 4.5\text{e-}03$ )  | 0.607( $\pm 2.4\text{e-}03$ ) | 1.1E+01  | 3.3E+03 | 9.5E-01 |
|          | NMI                      | 0.697( $\pm 1.5\text{e-}02$ )  | 0.895( $\pm 5.7\text{e-}04$ ) |          |         |         |
|          | ARI                      | 0.010( $\pm 1.7\text{e-}03$ )  | 0.142( $\pm 1.2\text{e-}03$ ) |          |         |         |
| Madelon  | ACC                      | 0.509( $\pm 8.4\text{e-}04$ )  | 0.535( $\pm 3.6\text{e-}02$ ) | 3.7E-01  | 2.7E-01 | 9.4E-02 |
|          | NMI                      | 0.000( $\pm 4.0\text{e-}05$ )  | 0.007( $\pm 1.2\text{e-}02$ ) |          |         |         |
|          | ARI                      | -0.000( $\pm 5.5\text{e-}05$ ) | 0.010( $\pm 1.6\text{e-}02$ ) |          |         |         |
| Mpeg7    | ACC                      | 0.464( $\pm 1.9\text{e-}02$ )  | 0.543( $\pm 8.0\text{e-}03$ ) | 8.8E-02  | 1.8E-01 | 6.2E-02 |
|          | NMI                      | 0.663( $\pm 1.4\text{e-}02$ )  | 0.716( $\pm 5.3\text{e-}03$ ) |          |         |         |
|          | ARI                      | 0.235( $\pm 3.1\text{e-}02$ )  | 0.377( $\pm 1.7\text{e-}02$ ) |          |         |         |
| MUCT     | ACC                      | 0.625( $\pm 2.3\text{e-}02$ )  | 0.976( $\pm 4.7\text{e-}03$ ) | 7.7E-01  | 2.4E+00 | 1.0E-01 |
|          | NMI                      | 0.787( $\pm 2.9\text{e-}02$ )  | 0.992( $\pm 1.5\text{e-}03$ ) |          |         |         |
|          | ARI                      | 0.087( $\pm 3.7\text{e-}02$ )  | 0.974( $\pm 4.7\text{e-}03$ ) |          |         |         |
| Olivetti | ACC                      | 0.523( $\pm 2.5\text{e-}02$ )  | 0.522( $\pm 1.3\text{e-}02$ ) | 6.0E-03  | 6.1E-02 | 1.9E-02 |
|          | NMI                      | 0.723( $\pm 1.7\text{e-}02$ )  | 0.724( $\pm 8.1\text{e-}03$ ) |          |         |         |
|          | ARI                      | 0.367( $\pm 3.1\text{e-}02$ )  | 0.388( $\pm 1.5\text{e-}02$ ) |          |         |         |
| Umist    | ACC                      | 0.443( $\pm 1.8\text{e-}02$ )  | 0.486( $\pm 2.2\text{e-}02$ ) | 1.5E-02  | 5.8E-02 | 1.8E-02 |
|          | NMI                      | 0.643( $\pm 1.9\text{e-}02$ )  | 0.663( $\pm 1.4\text{e-}02$ ) |          |         |         |
|          | ARI                      | 0.335( $\pm 2.9\text{e-}02$ )  | 0.397( $\pm 2.3\text{e-}02$ ) |          |         |         |
| Yale     | ACC                      | 0.415( $\pm 3.4\text{e-}02$ )  | 0.427( $\pm 2.4\text{e-}02$ ) | 1.6E-03  | 3.8E-02 | 6.6E-03 |
|          | NMI                      | 0.478( $\pm 2.5\text{e-}02$ )  | 0.465( $\pm 1.8\text{e-}02$ ) |          |         |         |
|          | ARI                      | 0.214( $\pm 2.9\text{e-}02$ )  | 0.204( $\pm 2.1\text{e-}02$ ) |          |         |         |

### 3 Sensitivity analysis of the parameter

There are only one parameter in LKM, i.e., the number of nearest neighbors. It can be seen from Figure 1 that the clustering performance is largely affected by the value of  $k$ , which is a common phenomenon in graph-based clustering methods. How to find an appropriate value of  $k$  is a problem we will study in the future.

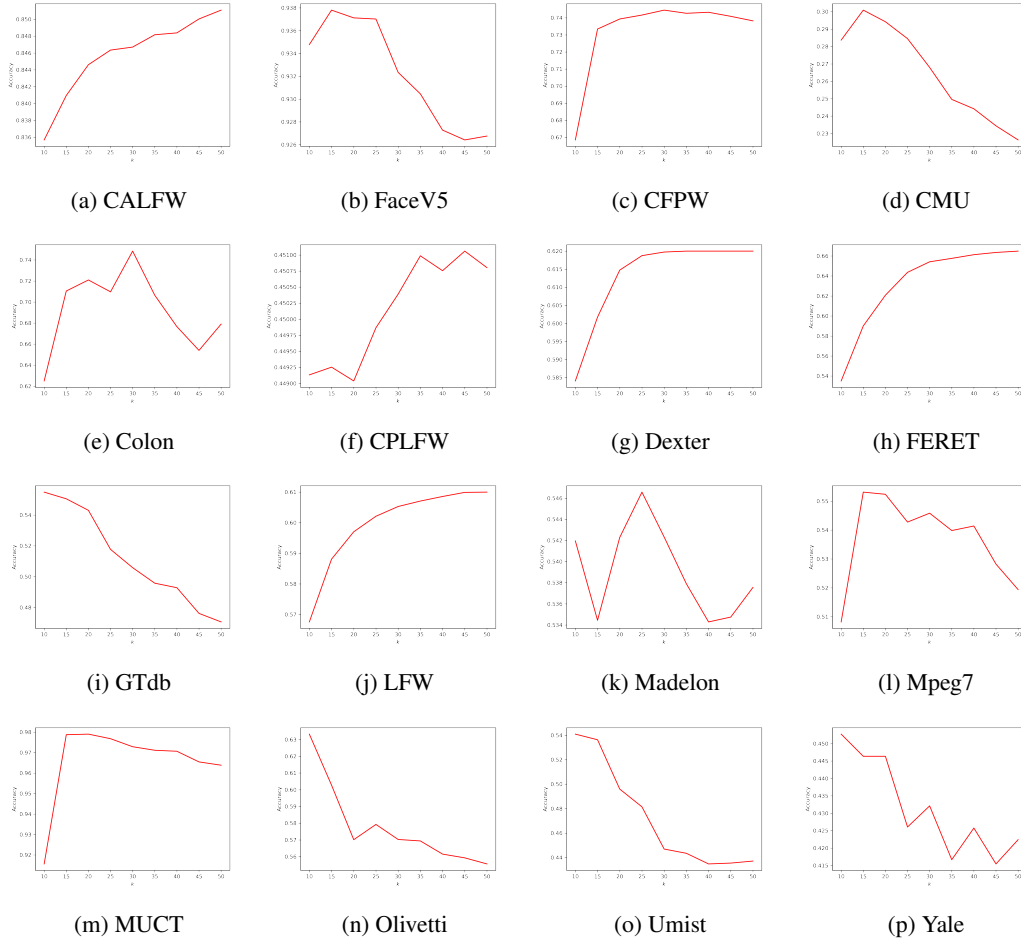

Figure 1: Performance vs. the number of nearest neighbors.

20

Table 3: Performance of LKM

|             | CALFW | FaceV5 | CFPW    | CMU   | Colon | CPLFW    | Dexter | FERET |
|-------------|-------|--------|---------|-------|-------|----------|--------|-------|
| $k_{max}$   | 50    | 15     | 30      | 15    | 30    | 45       | 35     | 50    |
| $Acc_{min}$ | 0.836 | 0.926  | 0.668   | 0.226 | 0.625 | 0.449    | 0.584  | 0.535 |
| $Acc_{max}$ | 0.851 | 0.938  | 0.745   | 0.301 | 0.748 | 0.451    | 0.62   | 0.665 |
| std         | 0.005 | 0.004  | 0.023   | 0.026 | 0.035 | 0.001    | 0.012  | 0.041 |
|             | GTdb  | LFW    | Madelon | Mpeg7 | MUCT  | Olivetti | Umist  | Yale  |
| $k_{max}$   | 10    | 50     | 25      | 15    | 20    | 10       | 10     | 10    |
| $Acc_{min}$ | 0.471 | 0.568  | 0.534   | 0.508 | 0.916 | 0.556    | 0.435  | 0.415 |
| $Acc_{max}$ | 0.555 | 0.61   | 0.547   | 0.553 | 0.979 | 0.633    | 0.541  | 0.453 |
| std         | 0.03  | 0.013  | 0.004   | 0.014 | 0.019 | 0.024    | 0.041  | 0.013 |

## 21 **4 The standard deviations of the performance**

22 Only one partition would be produced in RCC, if the parameter is fixed. Although multiple partitions  
23 would be produced in FINCH, only one is selected as the final clustering result. The number of  
24 clusters in the selected partition is nearest to that of the ground truth partition. Therefore, the standard  
25 deviations of the performance of RCC and FINCH are always zeros.

26 It can be seen from the results shown in Table 4 that the standard deviation of LKM is the smallest on  
27 most data sets, which verifies the robustness of LKM to initialization.

Table 4: The standard deviations of the performance

| Datasets | Metrics | AGCI                 | FCDMF                | Kmeans               | KSUMS                | SC                   | LKM                  |
|----------|---------|----------------------|----------------------|----------------------|----------------------|----------------------|----------------------|
| CALFW    | ACC     | $\pm 4.3\text{e-}03$ | $\pm 4.4\text{e-}03$ | $\pm 5.7\text{e-}03$ | $\pm 2.7\text{e-}03$ | $\pm 5.5\text{e-}03$ | $\pm 2.4\text{e-}03$ |
|          | NMI     | $\pm 2.0\text{e-}03$ | $\pm 1.3\text{e-}03$ | $\pm 2.0\text{e-}03$ | $\pm 5.3\text{e-}04$ | $\pm 1.9\text{e-}02$ | $\pm 5.5\text{e-}04$ |
|          | ARI     | $\pm 8.9\text{e-}03$ | $\pm 5.1\text{e-}03$ | $\pm 7.7\text{e-}03$ | $\pm 3.6\text{e-}03$ | $\pm 2.1\text{e-}03$ | $\pm 1.5\text{e-}02$ |
| CASIA    | ACC     | $\pm 1.4\text{e-}02$ | $\pm 7.9\text{e-}03$ | $\pm 1.3\text{e-}02$ | $\pm 1.1\text{e-}02$ | $\pm 1.4\text{e-}02$ | $\pm 5.1\text{e-}03$ |
|          | NMI     | $\pm 4.0\text{e-}03$ | $\pm 4.1\text{e-}03$ | $\pm 3.3\text{e-}03$ | $\pm 3.0\text{e-}03$ | $\pm 2.0\text{e-}02$ | $\pm 1.1\text{e-}03$ |
|          | ARI     | $\pm 2.5\text{e-}02$ | $\pm 1.7\text{e-}02$ | $\pm 1.8\text{e-}02$ | $\pm 1.4\text{e-}02$ | $\pm 2.3\text{e-}02$ | $\pm 6.0\text{e-}03$ |
| CFPW     | ACC     | $\pm 1.4\text{e-}02$ | $\pm 7.7\text{e-}03$ | $\pm 1.6\text{e-}02$ | $\pm 6.3\text{e-}03$ | $\pm 1.3\text{e-}02$ | $\pm 5.4\text{e-}03$ |
|          | NMI     | $\pm 7.5\text{e-}03$ | $\pm 3.6\text{e-}03$ | $\pm 7.7\text{e-}03$ | $\pm 2.1\text{e-}03$ | $\pm 1.2\text{e-}02$ | $\pm 3.5\text{e-}03$ |
|          | ARI     | $\pm 1.8\text{e-}02$ | $\pm 5.0\text{e-}03$ | $\pm 1.8\text{e-}02$ | $\pm 7.2\text{e-}03$ | $\pm 1.9\text{e-}02$ | $\pm 4.4\text{e-}02$ |
| CMU      | ACC     | $\pm 8.7\text{e-}03$ | $\pm 8.1\text{e-}03$ | $\pm 9.0\text{e-}03$ | $\pm 1.2\text{e-}02$ | $\pm 1.1\text{e-}02$ | $\pm 9.5\text{e-}03$ |
|          | NMI     | $\pm 7.2\text{e-}03$ | $\pm 9.6\text{e-}03$ | $\pm 7.9\text{e-}03$ | $\pm 8.1\text{e-}03$ | $\pm 6.1\text{e-}03$ | $\pm 9.6\text{e-}03$ |
|          | ARI     | $\pm 5.6\text{e-}03$ | $\pm 6.4\text{e-}03$ | $\pm 4.9\text{e-}03$ | $\pm 9.4\text{e-}03$ | $\pm 6.5\text{e-}03$ | $\pm 1.2\text{e-}02$ |
| Colon    | ACC     | $\pm 1.4\text{e-}01$ | $\pm 2.8\text{e-}02$ | $\pm 1.1\text{e-}01$ | $\pm 1.1\text{e-}01$ | $\pm 9.0\text{e-}03$ | $\pm 1.4\text{e-}01$ |
|          | NMI     | $\pm 1.8\text{e-}01$ | $\pm 4.6\text{e-}03$ | $\pm 1.3\text{e-}01$ | $\pm 1.5\text{e-}01$ | $\pm 1.6\text{e-}02$ | $\pm 2.0\text{e-}01$ |
|          | ARI     | $\pm 2.3\text{e-}01$ | $\pm 1.3\text{e-}02$ | $\pm 1.5\text{e-}01$ | $\pm 1.7\text{e-}01$ | $\pm 1.8\text{e-}02$ | $\pm 2.6\text{e-}01$ |
| CPLFW    | ACC     | $\pm 2.0\text{e-}03$ | $\pm 3.8\text{e-}03$ | $\pm 1.8\text{e-}03$ | $\pm 1.8\text{e-}03$ | $\pm 2.2\text{e-}03$ | $\pm 2.2\text{e-}03$ |
|          | NMI     | $\pm 2.1\text{e-}03$ | $\pm 3.9\text{e-}03$ | $\pm 1.5\text{e-}03$ | $\pm 3.3\text{e-}04$ | $\pm 4.2\text{e-}03$ | $\pm 1.8\text{e-}03$ |
|          | ARI     | $\pm 2.0\text{e-}05$ | $\pm 1.7\text{e-}04$ | $\pm 2.2\text{e-}05$ | $\pm 2.0\text{e-}03$ | $\pm 2.6\text{e-}03$ | $\pm 2.6\text{e-}03$ |
| Dexter   | ACC     | $\pm 5.1\text{e-}02$ | $\pm 0.0\text{e+}00$ | $\pm 3.8\text{e-}02$ | $\pm 3.2\text{e-}02$ | $\pm 6.7\text{e-}04$ | $\pm 1.2\text{e-}02$ |
|          | NMI     | $\pm 6.3\text{e-}02$ | $\pm 0.0\text{e+}00$ | $\pm 5.9\text{e-}02$ | $\pm 1.4\text{e-}02$ | $\pm 3.1\text{e-}04$ | $\pm 1.4\text{e-}02$ |
|          | ARI     | $\pm 2.7\text{e-}02$ | $\pm 1.4\text{e-}17$ | $\pm 2.3\text{e-}02$ | $\pm 1.9\text{e-}02$ | $\pm 3.6\text{e-}04$ | $\pm 8.4\text{e-}03$ |
| FERET    | ACC     | $\pm 5.8\text{e-}03$ | $\pm 5.1\text{e-}03$ | $\pm 8.9\text{e-}03$ | $\pm 2.1\text{e-}03$ | $\pm 7.5\text{e-}03$ | $\pm 3.3\text{e-}03$ |
|          | NMI     | $\pm 2.6\text{e-}03$ | $\pm 2.8\text{e-}03$ | $\pm 2.7\text{e-}03$ | $\pm 9.2\text{e-}04$ | $\pm 1.1\text{e-}02$ | $\pm 5.6\text{e-}04$ |
|          | ARI     | $\pm 9.6\text{e-}03$ | $\pm 9.4\text{e-}03$ | $\pm 1.2\text{e-}02$ | $\pm 2.3\text{e-}03$ | $\pm 1.0\text{e-}02$ | $\pm 5.2\text{e-}03$ |
| GTdb     | ACC     | $\pm 2.7\text{e-}02$ | $\pm 1.6\text{e-}02$ | $\pm 2.8\text{e-}02$ | $\pm 1.4\text{e-}02$ | $\pm 3.0\text{e-}02$ | $\pm 1.8\text{e-}02$ |
|          | NMI     | $\pm 1.5\text{e-}02$ | $\pm 8.7\text{e-}03$ | $\pm 1.3\text{e-}02$ | $\pm 7.9\text{e-}03$ | $\pm 2.2\text{e-}02$ | $\pm 8.6\text{e-}03$ |
|          | ARI     | $\pm 2.2\text{e-}02$ | $\pm 1.6\text{e-}02$ | $\pm 2.0\text{e-}02$ | $\pm 1.4\text{e-}02$ | $\pm 4.1\text{e-}02$ | $\pm 1.7\text{e-}02$ |
| LFW      | ACC     | $\pm 3.7\text{e-}03$ | $\pm 3.9\text{e-}03$ | $\pm 3.5\text{e-}03$ | $\pm 2.0\text{e-}03$ | $\pm 7.7\text{e-}03$ | $\pm 2.8\text{e-}03$ |
|          | NMI     | $\pm 6.1\text{e-}04$ | $\pm 8.7\text{e-}04$ | $\pm 7.4\text{e-}04$ | $\pm 4.8\text{e-}04$ | $\pm 2.1\text{e-}02$ | $\pm 5.0\text{e-}04$ |
|          | ARI     | $\pm 1.2\text{e-}03$ | $\pm 2.8\text{e-}03$ | $\pm 1.5\text{e-}03$ | $\pm 3.9\text{e-}04$ | $\pm 2.1\text{e-}03$ | $\pm 1.3\text{e-}03$ |
| Madelon  | ACC     | $\pm 2.9\text{e-}02$ | $\pm 1.1\text{e-}16$ | $\pm 3.4\text{e-}02$ | $\pm 2.8\text{e-}02$ | $\pm 2.8\text{e-}04$ | $\pm 2.1\text{e-}02$ |
|          | NMI     | $\pm 7.5\text{e-}03$ | $\pm 1.1\text{e-}19$ | $\pm 9.0\text{e-}03$ | $\pm 6.3\text{e-}03$ | $\pm 1.1\text{e-}05$ | $\pm 4.5\text{e-}03$ |
|          | ARI     | $\pm 1.0\text{e-}02$ | $\pm 5.4\text{e-}20$ | $\pm 1.2\text{e-}02$ | $\pm 8.8\text{e-}03$ | $\pm 1.5\text{e-}05$ | $\pm 6.2\text{e-}03$ |
| Mpeg7    | ACC     | $\pm 1.6\text{e-}02$ | $\pm 1.7\text{e-}02$ | $\pm 1.9\text{e-}02$ | $\pm 9.7\text{e-}03$ | $\pm 2.9\text{e-}02$ | $\pm 6.4\text{e-}03$ |
|          | NMI     | $\pm 9.3\text{e-}03$ | $\pm 7.8\text{e-}03$ | $\pm 1.4\text{e-}02$ | $\pm 6.7\text{e-}03$ | $\pm 2.9\text{e-}02$ | $\pm 5.8\text{e-}03$ |
|          | ARI     | $\pm 2.2\text{e-}02$ | $\pm 1.6\text{e-}02$ | $\pm 2.5\text{e-}02$ | $\pm 9.4\text{e-}03$ | $\pm 5.9\text{e-}02$ | $\pm 3.3\text{e-}02$ |
| MUCT     | ACC     | $\pm 2.6\text{e-}02$ | $\pm 1.5\text{e-}02$ | $\pm 3.3\text{e-}02$ | $\pm 2.3\text{e-}03$ | $\pm 2.4\text{e-}02$ | $\pm 3.3\text{e-}03$ |
|          | NMI     | $\pm 1.6\text{e-}02$ | $\pm 4.3\text{e-}03$ | $\pm 2.0\text{e-}02$ | $\pm 8.6\text{e-}04$ | $\pm 2.5\text{e-}02$ | $\pm 7.6\text{e-}04$ |
|          | ARI     | $\pm 1.4\text{e-}01$ | $\pm 1.7\text{e-}02$ | $\pm 1.5\text{e-}01$ | $\pm 2.6\text{e-}03$ | $\pm 3.2\text{e-}02$ | $\pm 3.1\text{e-}03$ |
| Olivetti | ACC     | $\pm 2.9\text{e-}02$ | $\pm 1.7\text{e-}02$ | $\pm 3.2\text{e-}02$ | $\pm 2.6\text{e-}02$ | $\pm 2.4\text{e-}02$ | $\pm 1.4\text{e-}02$ |
|          | NMI     | $\pm 1.5\text{e-}02$ | $\pm 1.0\text{e-}02$ | $\pm 1.7\text{e-}02$ | $\pm 1.1\text{e-}02$ | $\pm 1.3\text{e-}02$ | $\pm 7.3\text{e-}03$ |
|          | ARI     | $\pm 2.7\text{e-}02$ | $\pm 1.7\text{e-}02$ | $\pm 3.2\text{e-}02$ | $\pm 2.9\text{e-}02$ | $\pm 2.6\text{e-}02$ | $\pm 1.6\text{e-}02$ |
| Umist    | ACC     | $\pm 1.9\text{e-}02$ | $\pm 2.5\text{e-}02$ | $\pm 2.2\text{e-}02$ | $\pm 3.1\text{e-}02$ | $\pm 2.3\text{e-}02$ | $\pm 3.1\text{e-}02$ |
|          | NMI     | $\pm 2.1\text{e-}02$ | $\pm 1.9\text{e-}02$ | $\pm 2.4\text{e-}02$ | $\pm 2.0\text{e-}02$ | $\pm 2.2\text{e-}02$ | $\pm 2.3\text{e-}02$ |
|          | ARI     | $\pm 1.9\text{e-}02$ | $\pm 2.5\text{e-}02$ | $\pm 2.7\text{e-}02$ | $\pm 3.2\text{e-}02$ | $\pm 2.7\text{e-}02$ | $\pm 4.4\text{e-}02$ |
| Yale     | ACC     | $\pm 2.4\text{e-}02$ | $\pm 1.8\text{e-}02$ | $\pm 3.1\text{e-}02$ | $\pm 3.5\text{e-}02$ | $\pm 3.6\text{e-}02$ | $\pm 2.5\text{e-}02$ |
|          | NMI     | $\pm 2.9\text{e-}02$ | $\pm 1.3\text{e-}02$ | $\pm 2.7\text{e-}02$ | $\pm 2.8\text{e-}02$ | $\pm 3.3\text{e-}02$ | $\pm 2.0\text{e-}02$ |
|          | ARI     | $\pm 2.7\text{e-}02$ | $\pm 1.2\text{e-}02$ | $\pm 2.8\text{e-}02$ | $\pm 3.4\text{e-}02$ | $\pm 3.3\text{e-}02$ | $\pm 2.3\text{e-}02$ |
